# Supplementary material for: Self-assembly of gold nanoparticles in a block copolymer aggregate template driven by hydrophobic interactions
Source: Royal Society of Chemistry journal article supplement (doi:10.1039/c9py01266d), 2019-01-01
Supplement: c9py01266d1.pdf [file c9py01266d1.pdf]

## Supporting information

### **Self-Assembly of Gold Nanoparticles in Block Copolymer Aggregate Template Driven by Hydrophobic Interaction**

Jong Dae JANG, Sang-Woo JEON, Young-Jin YOON, Joona BANG, Young Soo HAN, and Tae-Hwan KIM

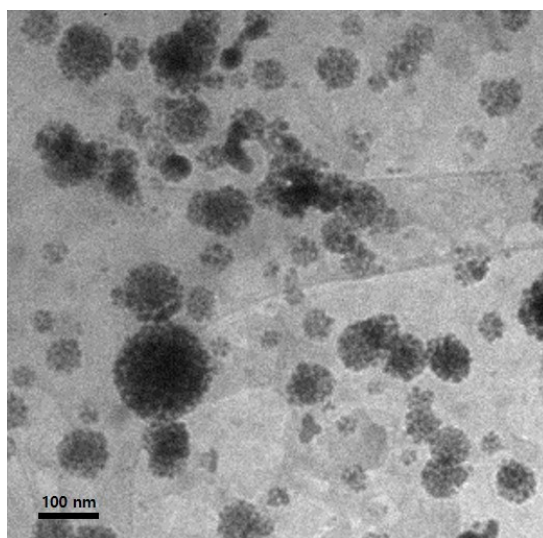

**Figure S1.** Cryo-TEM image of AuNP-F127<sub>1,25</sub>.
